# Supplementary material for: Neuroprotective effects of a ketogenic diet in combination with exogenous ketone salts following acute spinal cord injury
Source: PubMed Central journal article supplement — Neural Regen Res. 2020 Apr 3;15(10):1912–9. doi: 10.4103/1673-5374.280327 (PMC7513973; doi:10.4103/1673-5374.280327), 2020-04-03
Supplement: NRR-15-1912_Suppl2.pdf [file NRR-15-1912_Suppl2.pdf]

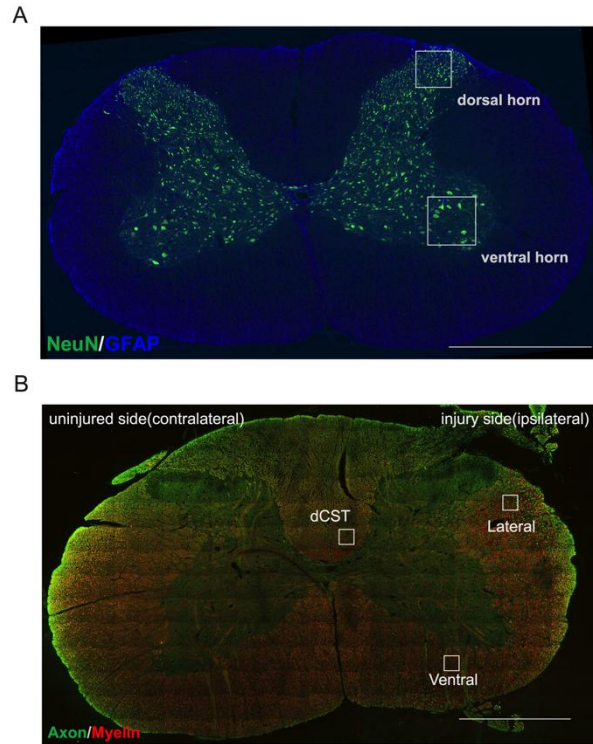

**Additional Figure 2 Schema of how NeuN<sup>+</sup> cells index (A) and axon index (B) analysis was performed.**

The frames are the region of interests to show where the boxes were placed. The axon index and the myelinated axon index shared the same analysis box. Scale bars: 500  $\mu$ m. dCST: dorsal corticospinal tract; GFAP: glial fibrillary acidic protein.
