# Supplementary figures and images for: Neuroprotective effects of a ketogenic diet in combination with exogenous ketone salts following acute spinal cord injury
Source: PubMed Central journal article supplement — Neural Regen Res. 2020 Apr 3;15(10):1912–9. doi: 10.4103/1673-5374.280327 (PMC7513973; doi:10.4103/1673-5374.280327), 2020-04-03

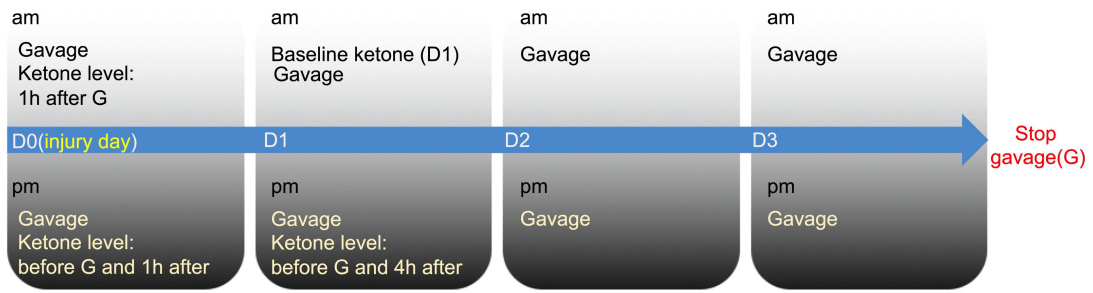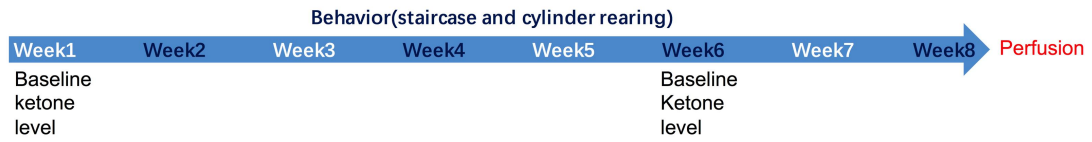

**Additional Figure 1 Experiment design (upper) and time line (lower).**

G: gavage.

Supplement: NRR-15-1912_Suppl1.pdf [file NRR-15-1912_Suppl1.pdf]
